# Supplementary figures and images for: Dynamics and regulatory roles of RNA m6A methylation in unbalanced genomes
Source: eLife journal article supplement (doi:10.7554/elife.100144), 2024-09-03

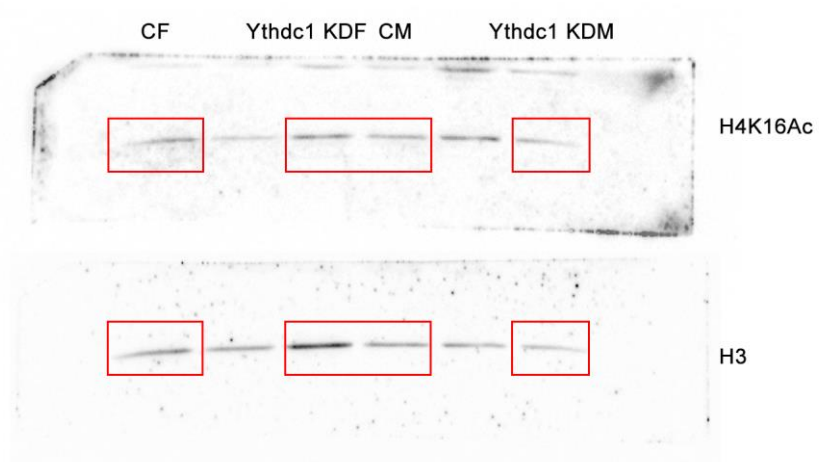

Figure 8—Source Data 1. Original membranes corresponding to Figure 8, panel D.

Supplement: fig8-data1 [file elife-100144-fig8-data1-v1.zip]
